# Supplementary material
Source: Springer Nature journal article supplement (https://www.springermedizin.de/resource/supplementary/12903_2008_115_MOESM2_ESM.pdf/9517424)

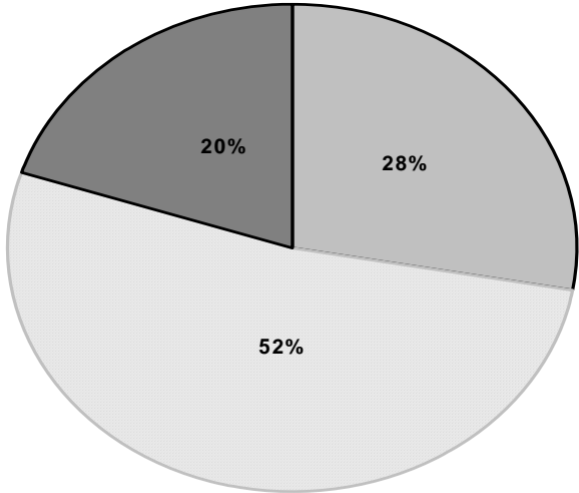

■ less than 24 hour   ■ 24-48 hour   ■ more than 48 hour

Supplement: MOESM2 [file 9517424]
